# Supplementary material
Source: PubMed Central journal article supplement (PMC3121489)
Supplement: supp_M110.169433_jbc.M110.169433-1.pdf [file supp_M110.169433_jbc.M110.169433-1.pdf]

## Supplementary material

### Figure S1. siRNA microarrays analysis flowchart

**Figure S2.** Box-plot presentation of *ID2* mRNA expression in all tissues and skin tissues present in the *in silico* transcriptomics database (Kilpinen *et al.*, Genome Biol. 2008). The box refers to the quartile distribution (25-75%) range, with the median shown as a vertical line (green in all tissues samples, blue in skin). In addition, the 95% range and individual outlier samples are shown.

**Figure S3.** (A) Expression of ID2 in A431 human skin cells, both in the nucleus and the cytoplasm. Cells were stained with fluorescent ID2-specific pAb (Green), DAPI for the nucleus (Blue), and anti-tubulin antibody as internal control and marker of microtubules (Red). These images were extracted from the Human Protein Atlas database ([www.proteinatlas.org](http://www.proteinatlas.org)) (B) Sections of frozen breast skin biopsies were stained with ID2 specific-mAb (Red). Scale bar is 100  $\mu$ m. Contrary to Figure 5A which was obtained from paraffin-embedded skin section, this frozen skin section was thicker and improved monitoring of the stratification of ID2 expression.

**Table S1:** List of all 220 genes screened with the siRNA microarrays. This excel file summarizes all the siRNAs analyzed by siRNA microarrays. For each siRNA, the HUGO gene symbol, Genbank accession number, Locuslink id and name of the target gene are reported.

**Table S2:** Putative regulators of *ID2*. The screen enabled identification of 14 putative repressors of *ID2*. For each gene, the gene symbol, Genbank accession number and siRNA ID number corresponding to the position of the siRNA sequence within the targeted transcript were reported. The rank computed for the most efficient siRNA (capacity to induce the highest *ID2* GFP expression) is indicated. As each siRNA was processed independently, even when they targeted the same gene, the ranking obtained with a second siRNA was also indicated in between brackets.

**Table S3:** List of the primers used in the study. All primers used in this study are listed in the table.

Figure S1

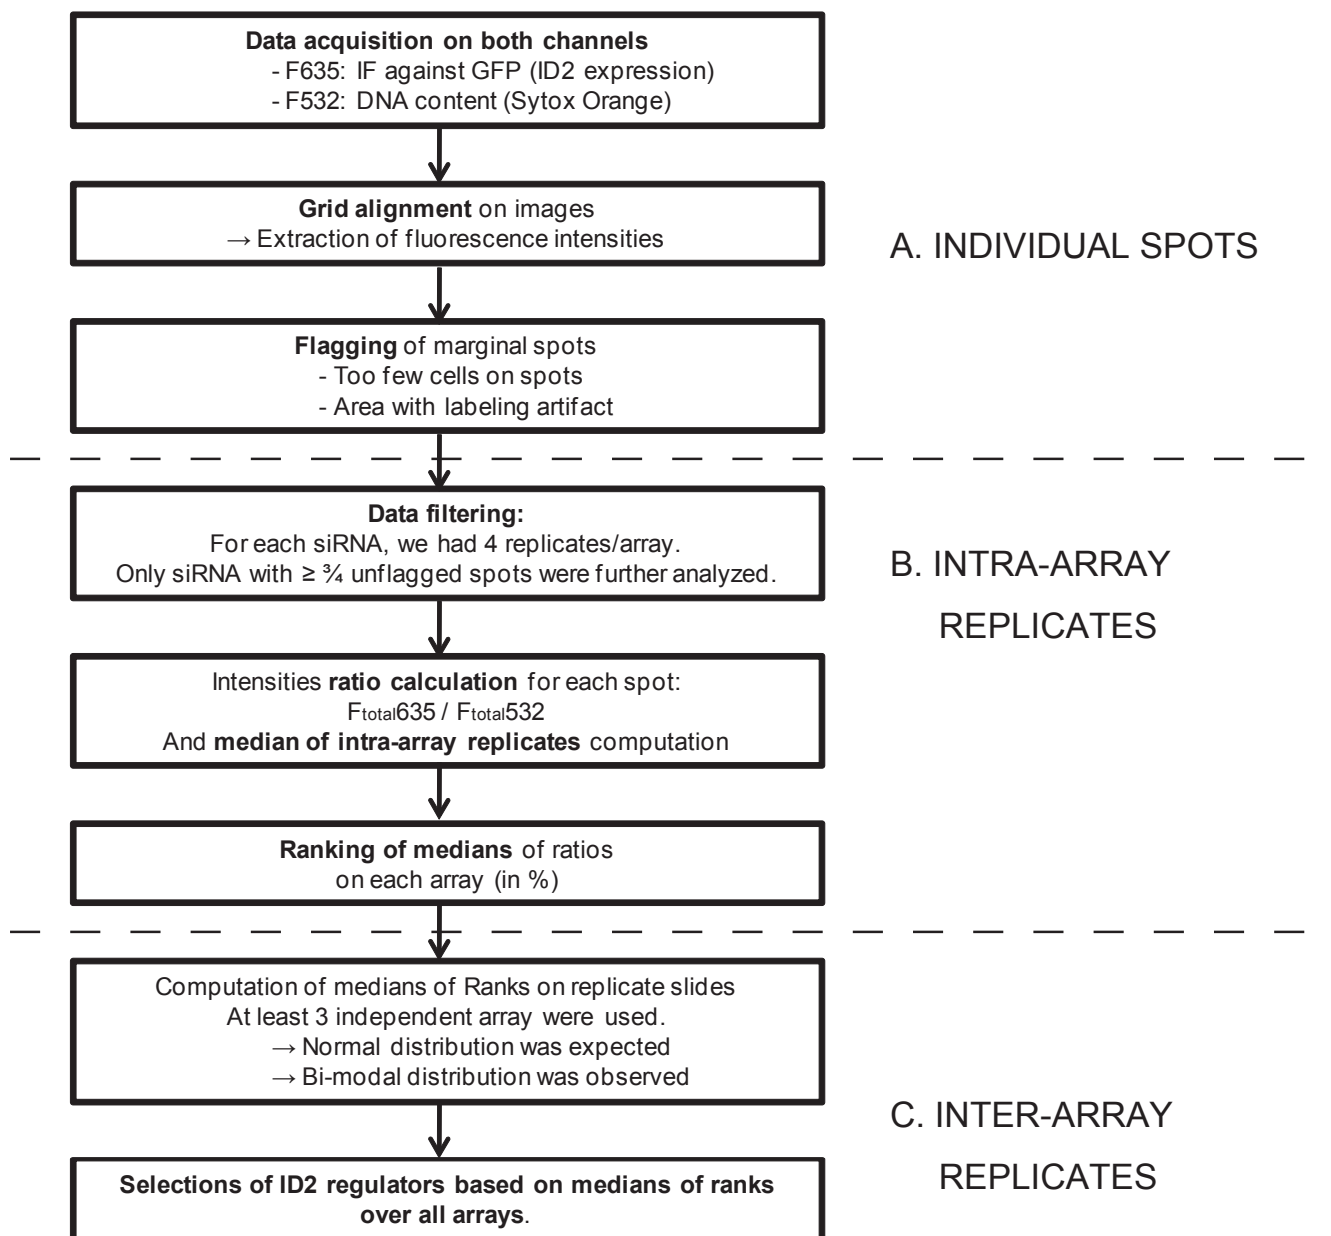

Figure S2

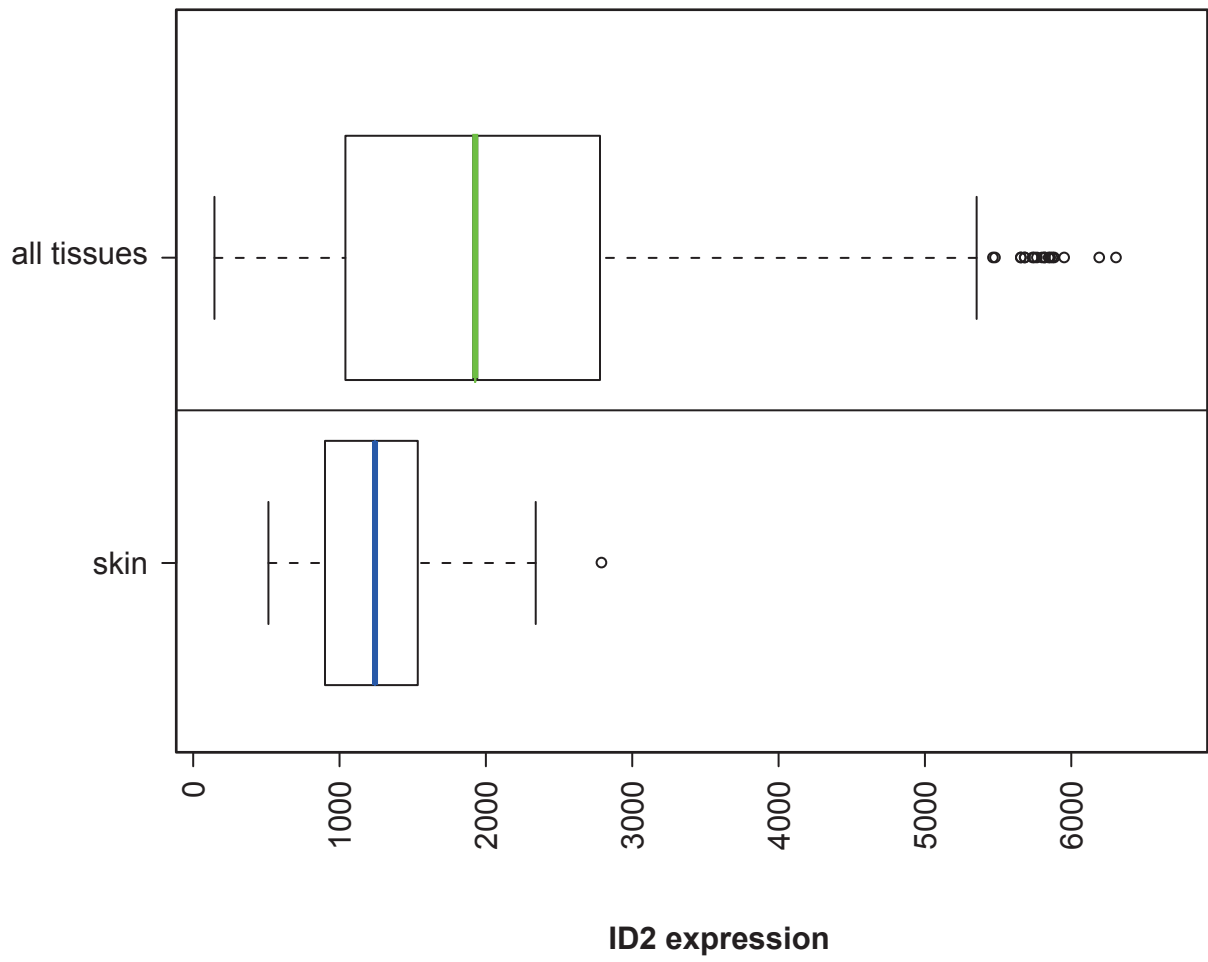

Figure S3

A

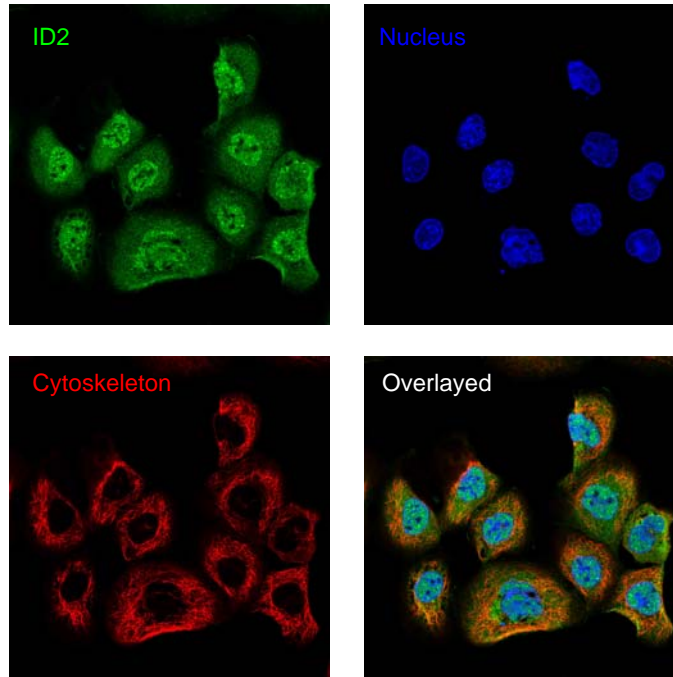

B

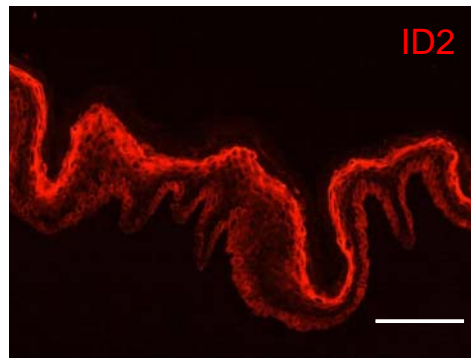

|     | Symbol    | Acc       | LLID   | Name                                                                                      |
|-----|-----------|-----------|--------|-------------------------------------------------------------------------------------------|
| 1   | ACAT2     | NM_005891 | 39     | Acetyl-Coenzyme A acetyltransferase 2 (acetoacetyl Coenzyme A thiolase)                   |
| 2   | ADAM17    | NM_003183 | 6868   | ADAM metalloproteinase domain 17 (tumor necrosis factor, alpha, converting enzyme)        |
| 3   | ANAPC1    | NM_022662 | 64682  | Anaphase promoting complex subunit 1                                                      |
| 4   | ANAPC10   | NM_014885 | 10393  | Anaphase promoting complex subunit 10                                                     |
| 5   | ANAPC2    | NM_013366 | 29882  | Anaphase promoting complex subunit 2                                                      |
| 6   | ANAPC4    | NM_013367 | 29945  | Anaphase promoting complex subunit 4                                                      |
| 7   | ANAPC5    | NM_016237 | 51433  | Anaphase promoting complex subunit 5                                                      |
| 8   | ANAPC7    | NM_016238 | 51434  | Anaphase promoting complex subunit 7                                                      |
| 9   | ANLN      | NM_018685 | 54443  | Anillin, actin binding protein                                                            |
| 10  | ANP32E    | NM_030920 | 81611  | Acidic (leucine-rich) nuclear phosphoprotein 32 family, member E                          |
| 11  | APC       | NM_000038 | 324    | Adenomatosis polyposis coli                                                               |
| 12  | APC2      | NM_005883 | 10297  | Adenomatosis polyposis coli 2                                                             |
| 13  | ARTS-1    | NM_016442 | 51752  | Type 1 tumor necrosis factor receptor shedding aminopeptidase regulator                   |
| 14  | ASPM      | NM_018136 | 259266 | Asp (abnormal spindle) homolog, microcephaly associated (Drosophila)                      |
| 15  | ATAD2     | NM_014109 | 29028  | ATPase family, AAA domain containing 2                                                    |
| 16  | ATM       | NM_000051 | 472    | Ataxia telangiectasia mutated                                                             |
| 17  | ATR       | NM_001184 | 545    | Ataxia telangiectasia and Rad3 related                                                    |
| 18  | AURKB     | NM_004217 | 9212   | Aurora kinase B                                                                           |
| 19  | BARD1     | NM_000465 | 580    | BRCA1 associated RING domain 1                                                            |
| 20  | BIRC5     | NM_001168 | 332    | Baculoviral IAP repeat-containing 5 (survivin)                                            |
| 21  | BRCA1     | NM_007294 | 672    | Breast cancer 1, early onset                                                              |
| 22  | BRCA2     | NM_000059 | 675    | Breast cancer 2, early onset                                                              |
| 23  | BRMS1     | NM_015399 | 25855  | Breast cancer metastasis suppressor 1                                                     |
| 24  | BRMS1L    | NM_032352 | 84312  | Breast cancer metastasis-suppressor 1-like                                                |
| 25  | BUB1      | NM_004336 | 699    | BUB1 budding uninhibited by benzimidazoles 1 homolog (yeast)                              |
| 26  | BUB1B     | NM_001211 | 701    | BUB1 budding uninhibited by benzimidazoles 1 homolog beta (yeast)                         |
| 27  | BUB3      | NM_004725 | 9184   | BUB3 budding uninhibited by benzimidazoles 3 homolog (yeast)                              |
| 28  | C14orf156 | NM_031210 | 81892  | Chromosome 14 open reading frame 156                                                      |
| 29  | C14orf173 | BC006173  | 64423  | Chromosome 14 open reading frame 173                                                      |
| 30  | CALM1     | NM_006888 | 801    | Calmodulin 1 (phosphorylase kinase, delta)                                                |
| 31  | CAV1      | NM_001753 | 857    | Caveolin 1, caveolae protein, 22kDa                                                       |
| 32  | CAV2      | NM_001233 | 858    | Caveolin 2                                                                                |
| 33  | CCDC88    | NM_024098 | 79080  | Coiled-coil domain containing 86                                                          |
| 34  | CCNA1     | NM_003914 | 8900   | Cyclin A1                                                                                 |
| 35  | CCNA2     | NM_001237 | 890    | Cyclin A2                                                                                 |
| 36  | CCNB2     | NM_004701 | 9133   | Cyclin B2                                                                                 |
| 37  | CCND2     | NM_001759 | 894    | Cyclin D2                                                                                 |
| 38  | CCND3     | NM_001760 | 896    | Cyclin D3                                                                                 |
| 39  | CCNF      | NM_001761 | 899    | Cyclin F                                                                                  |
| 40  | CCNG2     | NM_004354 | 901    | Cyclin G2                                                                                 |
| 41  | CCNH      | NM_001239 | 902    | Cyclin H                                                                                  |
| 42  | CCNK      | NM_003858 | 8812   | Cyclin K                                                                                  |
| 43  | CCNT1     | NM_001240 | 904    | Cyclin T1                                                                                 |
| 44  | CD320     | NM_016579 | 51293  | CD320 molecule                                                                            |
| 45  | CDC14A    | NM_003672 | 8556   | CDC14 cell division cycle 14 homolog A (S. cerevisiae)                                    |
| 46  | CDC14B    | NM_003671 | 8555   | CDC14 cell division cycle 14 homolog B (S. cerevisiae)                                    |
| 47  | CDC73     | NM_024529 | 79577  | Cell division cycle 73, Paf1/RNA polymerase II complex component, homolog (S. cerevisiae) |
| 48  | CDH1      | NM_004360 | 999    | Cadherin 1, type 1, E-cadherin (epithelial)                                               |
| 49  | CDH19     | NM_021153 | 28513  | Cadherin 19, type 2                                                                       |
| 50  | CDH20     | NM_031891 | 28316  | Cadherin 20, type 2                                                                       |
| 51  | CDK2AP2   | NM_005851 | 10263  | CDK2-associated protein 2                                                                 |
| 52  | CDKN1A    | NM_000389 | 1026   | Cyclin-dependent kinase inhibitor 1A (p21, Cip1)                                          |
| 53  | CDKN1B    | NM_004064 | 1027   | Cyclin-dependent kinase inhibitor 1B (p27, Kip1)                                          |
| 54  | CDKN1C    | NM_000076 | 1028   | Cyclin-dependent kinase inhibitor 1C (p57, Kip2)                                          |
| 55  | CDKN2A    | NM_000077 | 1029   | Cyclin-dependent kinase inhibitor 2A (melanoma, p16, inhibits CDK4)                       |
| 56  | CDKN2B    | NM_004936 | 1030   | Cyclin-dependent kinase inhibitor 2B (p15, inhibits CDK4)                                 |
| 57  | CDKN2C    | NM_001262 | 1031   | Cyclin-dependent kinase inhibitor 2C (p18, inhibits CDK4)                                 |
| 58  | CDKN3     | NM_005192 | 1033   | Cyclin-dependent kinase inhibitor 3 (CDK2-associated dual specificity phosphatase)        |
| 59  | CENPM     | NM_024053 | 79019  | Centromere protein M                                                                      |
| 60  | CENPN     | NM_018455 | 55839  | Centromere protein N                                                                      |
| 61  | CEP55     | NM_018131 | 55165  | Centrosomal protein 55kDa                                                                 |
| 62  | CNKR1     | NM_006314 | 10256  | Connector enhancer of kinase suppressor of Ras 1                                          |
| 63  | CYB561D2  | NM_007022 | 11068  | Cytochrome b-561 domain containing 2                                                      |
| 64  | CYLD      | NM_015247 | 1540   | Cylindromatosis (turban tumor syndrome)                                                   |
| 65  | DAPK1     | NM_004938 | 1612   | Death-associated protein kinase 1                                                         |
| 66  | DBF4      | NM_006716 | 10926  | DBF4 homolog (S. cerevisiae)                                                              |
| 67  | DMC1      | NM_007068 | 11144  | DMC1 dosage suppressor of mck1 homolog, meiosis-specific homologous recombination (yeast) |
| 68  | DPH1      | NM_008022 | 1801   | DPH1 homolog (S. cerevisiae)                                                              |
| 69  | DTL       | NM_018448 | 51514  | Denticleless homolog (Drosophila)                                                         |
| 70  | E2F1      | NM_005225 | 1869   | E2F transcription factor 1                                                                |
| 71  | ECD       | NM_007265 | 11319  | Ecdysoneless homolog (Drosophila)                                                         |
| 72  | FAT       | NM_005245 | 2195   | FAT tumor suppressor homolog 1 (Drosophila)                                               |
| 73  | FAT2      | NM_001447 | 2196   | FAT tumor suppressor homolog 2 (Drosophila)                                               |
| 74  | GADD45A   | NM_001924 | 1647   | Growth arrest and DNA-damage-inducible, alpha                                             |
| 75  | GADD45B   | NM_015875 | 4616   | Growth arrest and DNA-damage-inducible, beta                                              |
| 76  | GADD45G   | NM_006705 | 10912  | Growth arrest and DNA-damage-inducible, gamma                                             |
| 77  | GIN2      | NM_018095 | 51659  | GIN5 complex subunit 2 (Psf2 homolog)                                                     |
| 78  | GLTSCR1   | NM_015711 | 29998  | Glioma tumor suppressor candidate region gene 1                                           |
| 79  | GLTSCR2   | NM_015710 | 29997  | Glioma tumor suppressor candidate region gene 2                                           |
| 80  | GMNN      | NM_015895 | 51053  | Geminin, DNA replication inhibitor                                                        |
| 81  | GPS1      | NM_004127 | 2873   | G protein pathway suppressor 1                                                            |
| 82  | GPS2      | NM_004489 | 2874   | G protein pathway suppressor 2                                                            |
| 83  | GSTO1     | NM_004832 | 9446   | Glutathione S-transferase omega 1                                                         |
| 84  | GTSE1     | NM_016426 | 51512  | G-2 and S-phase expressed 1                                                               |
| 85  | HEY1      | NM_012258 | 23462  | Hairy/enhancer-of-split related with YRPW motif 1                                         |
| 86  | HIC1      | NM_006497 | 3090   | Hypermethylated in cancer 1                                                               |
| 87  | HIF1A     | NM_001530 | 3091   | Hypoxia-inducible factor 1, alpha subunit (basic helix-loop-helix transcription factor)   |
| 88  | HMG2      | NM_003483 | 8091   | High mobility group AT-hook 2                                                             |
| 89  | HMG2B     | NM_002129 | 3148   | High-mobility group box 2                                                                 |
| 90  | HPRT1     | NM_000194 | 3251   | Hypoxanthine phosphoribosyltransferase 1 (Lesch-Nyhan syndrome)                           |
| 91  | HRASL5    | NM_020386 | 57110  | HRAS-like suppressor                                                                      |
| 92  | HRASL2    | NM_017878 | 54979  | HRAS-like suppressor 2                                                                    |
| 93  | HRASL3    | NM_007069 | 11145  | HRAS-like suppressor 3                                                                    |
| 94  | HSP90B1   | NM_003299 | 7184   | Heat shock protein 90kDa beta (Grp94), member 1                                           |
| 95  | HSPC111   | NM_016391 | 51491  | Hypothetical protein HSPC111                                                              |
| 96  | HUS1      | NM_004507 | 3364   | HUS1 checkpoint homolog (S. pombe)                                                        |
| 97  | INCENP    | NM_020238 | 3619   | Inner centromere protein antigens 135/155kDa                                              |
| 98  | IPO7      | NM_006391 | 10527  | Importin 7                                                                                |
| 99  | ITGA6     | NM_000210 | 3655   | Integrin, alpha 6                                                                         |
| 100 | KIAA0101  | NM_014736 | 9768   | KIAA0101                                                                                  |
| 101 | KIAA1524  | NM_020890 | 57650  | KIAA1524                                                                                  |
| 102 | KIF11     | NM_004523 | 3832   | Kinesin family member 11                                                                  |
| 103 | KIF15     | NM_020242 | 56992  | Kinesin family member 15                                                                  |
| 104 | KIF20A    | NM_005733 | 10112  | Kinesin family member 20A                                                                 |
| 105 | KIF22     | NM_007317 | 3835   | Kinesin family member 22                                                                  |
| 106 | KIF3B     | NM_004798 | 9371   | Kinesin family member 3B                                                                  |
| 107 | KIF4A     | NM_012310 | 24137  | Kinesin family member 4A                                                                  |
| 108 | KISS1     | NM_002256 | 3814   | KISS-1 metastasis-suppressor                                                              |
| 109 | KNTC1     | NM_014708 | 9735   | Kinetochore associated 1                                                                  |
| 110 | KSR2      | NM_173598 | 283455 | Kinase suppressor of ras 2                                                                |
| 111 | LATS1     | NM_004690 | 9113   | LATS, large tumor suppressor, homolog 1 (Drosophila)                                      |

|     |          |           |        |                                                                                                                                          |
|-----|----------|-----------|--------|------------------------------------------------------------------------------------------------------------------------------------------|
| 112 | LATS2    | NM_014572 | 26524  | LATS, large tumor suppressor, homolog 2 (Drosophila)                                                                                     |
| 113 | LLGL1    | NM_004140 | 3996   | Lethal giant larvae homolog 1 (Drosophila)                                                                                               |
| 114 | LLGL2    | NM_004524 | 3993   | Lethal giant larvae homolog 2 (Drosophila)                                                                                               |
| 115 | LUZP4    | NM_016383 | 51213  | Leucine zipper protein 4                                                                                                                 |
| 116 | LZTS1    | NM_021020 | 11178  | Leucine zipper, putative tumor suppressor 1                                                                                              |
| 117 | LZTS2    | NM_032429 | 84445  | Leucine zipper, putative tumor suppressor 2                                                                                              |
| 118 | MAD2L1   | NM_002358 | 4085   | MAD2 mitotic arrest deficient-like 1 (yeast)                                                                                             |
| 119 | MAD2L2   | NM_006341 | 10459  | MAD2 mitotic arrest deficient-like 2 (yeast)                                                                                             |
| 120 | MAPRE1   | NM_012325 | 22919  | Microtubule-associated protein, RP/EB family, member 1                                                                                   |
| 121 | MAPRE2   | NM_012325 | 22919  | Microtubule-associated protein, RP/EB family, member 1                                                                                   |
| 122 | MAPRE2   | NM_014268 | 10982  | Microtubule-associated protein, RP/EB family, member 2                                                                                   |
| 123 | MASTL    | NM_032844 | 84930  | Microtubule associated serine/threonine kinase-like                                                                                      |
| 124 | MCM2     | NM_004526 | 4171   | Minichromosome maintenance complex component 2                                                                                           |
| 125 | MELK     | NM_014791 | 9833   | Maternal embryonic leucine zipper kinase                                                                                                 |
| 126 | MKI67    | NM_002417 | 4288   | Antigen identified by monoclonal antibody Ki-67                                                                                          |
| 127 | MOBK1B   | NM_018221 | 55233  | MOB1, Mps One Binder kinase activator-like 1B (yeast)                                                                                    |
| 128 | MRPL23   | NM_021134 | 6150   | Mitochondrial ribosomal protein L23                                                                                                      |
| 129 | MRPS17   | NM_015969 | 51373  | Mitochondrial ribosomal protein S17                                                                                                      |
| 130 | MRPS28   | NM_014018 | 28957  | Mitochondrial ribosomal protein S28                                                                                                      |
| 131 | MRT04    | NM_016183 | 51154  | MRNA turnover 4 homolog (S. cerevisiae)                                                                                                  |
| 132 | MTHFD1   | NM_005956 | 4522   | Methylenetetrahydrofolate dehydrogenase (NADP+ dependent) 1, methylenetetrahydrofolate cyclohydrolase, formyltetrahydrofolate synthetase |
| 133 | MYH10    | NM_005964 | 4628   | Myosin, heavy chain 10, non-muscle                                                                                                       |
| 134 | MYH9     | NM_002473 | 4627   | Myosin, heavy chain 9, non-muscle                                                                                                        |
| 135 | NBN      | NM_002485 | 4683   | Nibrin                                                                                                                                   |
| 136 | NCAPG    | NM_022346 | 64151  | Non-SMC condensin I complex, subunit G                                                                                                   |
| 137 | NDC80    | NM_006101 | 10403  | NDC80 homolog, kinetochore complex component (S. cerevisiae)                                                                             |
| 138 | NEK2     | NM_002497 | 4751   | NIIMA (never in mitosis gene a)-related kinase 2                                                                                         |
| 139 | NF1      | NM_002267 | 4763   | Neurofibromin 1 (neurofibromatosis, von Recklinghausen disease, Watson disease)                                                          |
| 140 | NF2      | NM_002268 | 4771   | Neurofibromin 2 (bilateral acoustic neuroma)                                                                                             |
| 141 | NKTR     | NM_005385 | 4820   | Natural killer-tumor recognition sequence                                                                                                |
| 142 | NUDCD1   | NM_032869 | 84955  | NudC domain containing 1                                                                                                                 |
| 143 | OPCML    | NM_002545 | 4978   | Opioid binding protein/cell adhesion molecule-like                                                                                       |
| 144 | ORC6L    | NM_014321 | 23594  | Origin recognition complex, subunit 6 like (yeast)                                                                                       |
| 145 | PA2G4    | NM_006191 | 5036   | Proliferation-associated 2G4, 38kDa                                                                                                      |
| 146 | PAICS    | NM_006452 | 10606  | Phosphoribosylaminoimidazole carboxylase, phosphoribosylaminoimidazole succinocarboxamide synthetase                                     |
| 147 | PDGFRL   | NM_006207 | 5157   | Platelet-derived growth factor receptor-like                                                                                             |
| 148 | PI4KB    | NM_002651 | 5298   | Phosphatidylinositol 4-kinase, catalytic, beta                                                                                           |
| 149 | PLK1     | NM_005030 | 5347   | Polo-like kinase 1 (Drosophila)                                                                                                          |
| 150 | PPP1CC   | NM_002710 | 5501   | Protein phosphatase 1, catalytic subunit, gamma isoform                                                                                  |
| 151 | PPP1R12A | NM_002480 | 4659   | Protein phosphatase 1, regulatory (inhibitor) subunit 12A                                                                                |
| 152 | PRDX4    | NM_006406 | 10549  | Peroxiredoxin 4                                                                                                                          |
| 153 | PRDX6    | NM_004905 | 9588   | Peroxiredoxin 6                                                                                                                          |
| 154 | PRIM1    | NM_000946 | 5557   | Primase, DNA, polypeptide 1 (49kDa)                                                                                                      |
| 155 | PRKCA    | NM_002737 | 5578   | Protein kinase C, alpha                                                                                                                  |
| 156 | PSMB3    | NM_002795 | 5691   | Proteasome (prosome, macropain) subunit, beta type, 3                                                                                    |
| 157 | PSMB6    | NM_002798 | 5694   | Proteasome (prosome, macropain) subunit, beta type, 6                                                                                    |
| 158 | PTEN     | NM_000314 | 5728   | Phosphatase and tensin homolog (mutated in multiple advanced cancers 1)                                                                  |
| 159 | PTTG1    | NM_004219 | 9232   | Pituitary tumor-transforming 1                                                                                                           |
| 160 | PTTG1IP  | NM_004339 | 754    | Pituitary tumor-transforming 1 interacting protein                                                                                       |
| 161 | PTTG2    | NM_006607 | 10744  | Pituitary tumor-transforming 2                                                                                                           |
| 162 | RAB6C    | NM_032144 | 84084  | RAB6C, member RAS oncogene family                                                                                                        |
| 163 | RACGAP1  | NM_013277 | 29127  | Rac GTPase activating protein 1                                                                                                          |
| 164 | RAD21    | NM_006265 | 5885   | RAD21 homolog (S. pombe)                                                                                                                 |
| 165 | RAD51AP1 | NM_006479 | 10635  | RAD51 associated protein 1                                                                                                               |
| 166 | RAD54L   | NM_003579 | 8438   | RAD54-like (S. cerevisiae)                                                                                                               |
| 167 | RAD9A    | NM_004584 | 5883   | RAD9 homolog A (S. pombe)                                                                                                                |
| 168 | RASSF1   | NM_007182 | 11186  | Ras association (RalGDS/AF-6) domain family 1                                                                                            |
| 169 | RASSF4   | NM_032023 | 83937  | Ras association (RalGDS/AF-6) domain family 4                                                                                            |
| 170 | RB1      | NM_000321 | 5925   | Retinoblastoma 1 (including osteosarcoma)                                                                                                |
| 171 | RB1CC1   | NM_014781 | 9821   | RB1-inducible coiled-coil 1                                                                                                              |
| 172 | RBAK     | NM_021163 | 57786  | RB-associated KRAB zinc finger                                                                                                           |
| 173 | RBBP4    | NM_005610 | 5928   | Retinoblastoma binding protein 4                                                                                                         |
| 174 | RBBP7    | NM_002893 | 5931   | Retinoblastoma binding protein 7                                                                                                         |
| 175 | RBL1     | NM_002895 | 5933   | Retinoblastoma-like 1 (p107)                                                                                                             |
| 176 | RBL2     | NM_005611 | 5934   | Retinoblastoma-like 2 (p130)                                                                                                             |
| 177 | RHOA     | NM_001664 | 387    | Ras homolog gene family, member A                                                                                                        |
| 178 | RIT1     | NM_006912 | 6016   | Ras-like without CAAX 1                                                                                                                  |
| 179 | ROCK1    | NM_005406 | 6093   | Rho-associated, coiled-coil containing protein kinase 1                                                                                  |
| 180 | ROCK2    | NM_004850 | 9475   | Rho-associated, coiled-coil containing protein kinase 2                                                                                  |
| 181 | ROD1     | NM_005156 | 9991   | ROD1 regulator of differentiation 1 (S. pombe)                                                                                           |
| 182 | RSU1     | NM_012425 | 6251   | Ras suppressor protein 1                                                                                                                 |
| 183 | RTDR1    | NM_014433 | 27156  | Rhabdoid tumor deletion region gene 1                                                                                                    |
| 184 | SACM1L   | NM_014016 | 22908  | SAC1 suppressor of actin mutations 1-like (yeast)                                                                                        |
| 185 | SEL-1L   | NM_005065 | 6400   | SEL-1 suppressor of lin-12-like (C. elegans)                                                                                             |
| 186 | SOD2     | NM_000536 | 6648   | Superoxide dismutase 2, mitochondrial                                                                                                    |
| 187 | STEAP4   | NM_024636 | 79689  | STEAP family member 4                                                                                                                    |
| 188 | SUFU     | NM_016169 | 51684  | Suppressor of fused homolog (Drosophila)                                                                                                 |
| 189 | SUHW1    | NM_080740 | 129025 | Suppressor of hairy wing homolog 1 (Drosophila)                                                                                          |
| 190 | SUHW2    | NM_080764 | 140883 | Suppressor of hairy wing homolog 2 (Drosophila)                                                                                          |
| 191 | TP53     | NM_000546 | 7157   | Tumor protein p53 (Li-Fraumeni syndrome)                                                                                                 |
| 192 | TP53BP1  | NM_005657 | 7158   | Tumor protein p53 binding protein 1                                                                                                      |
| 193 | TP53BP2  | NM_005426 | 7159   | Tumor protein p53 binding protein, 2                                                                                                     |
| 194 | TP53I11  | NM_006034 | 9537   | Tumor protein p53 inducible protein 11                                                                                                   |
| 195 | TP53I3   | NM_004881 | 9540   | Tumor protein p53 inducible protein 3                                                                                                    |
| 196 | TP53INP1 | NM_033285 | 94241  | Tumor protein p53 inducible nuclear protein 1                                                                                            |
| 197 | TP63     | NM_003722 | 8626   | Tumor protein p63                                                                                                                        |
| 198 | TP73     | NM_005427 | 7161   | Tumor protein p73                                                                                                                        |
| 199 | TRIM59   | NM_173084 | 286827 | Tripartite motif-containing 59                                                                                                           |
| 200 | TSG101   | NM_006292 | 7251   | Tumor susceptibility gene 101                                                                                                            |
| 201 | TSPYL2   | NM_022117 | 64061  | TSPY-like 2                                                                                                                              |
| 202 | TSSC1    | NM_003310 | 7260   | Tumor suppressing subtransferable candidate 1                                                                                            |
| 203 | TSSC4    | NM_005706 | 10078  | Tumor suppressing subtransferable candidate 4                                                                                            |
| 204 | TUSC2    | NM_007275 | 11334  | Tumor suppressor candidate 2                                                                                                             |
| 205 | TUSC3    | NM_006765 | 7991   | Tumor suppressor candidate 3                                                                                                             |
| 206 | TUSC4    | NM_006645 | 10641  | Tumor suppressor candidate 4                                                                                                             |
| 207 | UBE2T    | NM_014176 | 29089  | Ubiquitin-conjugating enzyme E2T (putative)                                                                                              |
| 208 | VBP1     | NM_003372 | 7411   | Von Hippel-Lindau binding protein 1                                                                                                      |
| 209 | VHL      | NM_000551 | 7428   | Von Hippel-Lindau tumor suppressor                                                                                                       |
| 210 | WIT1     | NM_015855 | 51352  | Wilms tumor upstream neighbor 1                                                                                                          |
| 211 | WT1      | NM_000378 | 7490   | Wilms tumor 1                                                                                                                            |
| 212 | WTAP     | NM_004906 | 9589   | Wilms tumor 1 associated protein                                                                                                         |
| 213 | ZNF197   | NM_006991 | 10168  | Zinc finger protein 197                                                                                                                  |
| 214 |          | NM_015438 |        | Data not found                                                                                                                           |
| 215 |          | NM_021000 |        | Data not found                                                                                                                           |
| 216 |          | XM_061871 |        | Data not found                                                                                                                           |
| 217 |          | XM_290793 |        | Data not found                                                                                                                           |
| 218 |          | XM_371813 |        | Data not found                                                                                                                           |
| 219 |          | XM_372031 |        | Data not found                                                                                                                           |
| 220 |          | XM_374860 |        | Data not found                                                                                                                           |

**Table S2.**

| <b>Target Gene</b> | <b>Accession Number</b> | <b>siRNA ID</b> | <b>Rank</b>     |
|--------------------|-------------------------|-----------------|-----------------|
| ANAPC4             | NM_013367               | 2201            | <b>4</b> -(24)  |
| AURKB              | NM_004217               | 495             | <b>1</b> -(50)  |
| BRMS1L             | NM_032352               | 443             | <b>5</b> -(53)  |
| BUB1B              | NM_001211               | 357             | <b>5</b> -(20)  |
| CYLD               | NM_015247               | 2473            | <b>1</b> -(43)  |
| DTL                | NM_016448               | 4077            | <b>6</b> -(md)  |
| ECD                | NM_007265               | 1924            | <b>3</b> -(91)  |
| HIC1               | NM_006497               | 245             | <b>2</b> -(67)  |
| LATS2              | NM_014572               | 3443            | <b>4</b> -(18)  |
| LZTS2              | NM_032429               | 2478            | <b>6</b> -(94)  |
| NBN                | NM_002485               | 990             | <b>5</b> -(87)  |
| RAD21              | NM_006265               | 1502            | <b>1</b> -(md)  |
| RIT1               | NM_006912               | 301             | <b>3</b> -(119) |
| TP63               | NM_003722               | 2442            | <b>6</b> -(28)  |

**Table S3. Primers for cloning, qRT-PCR and ChIP-PCR analysis.**

| <b>Primers for qRT-PCR analysis</b> |                                  |
|-------------------------------------|----------------------------------|
| ID2 F                               | 5'- GACCCGATGAGCCTGCTATAC -3'    |
| ID2 R                               | 5'- AATAGTGGGATGCGAGTCCAG -3'    |
|                                     |                                  |
| NBN F                               | 5'- TCTGTAACCAACCTGAGTCAAAC -3'  |
| NBN R                               | 5'- TCAAAGTTCGGGAAAAGCCATT -3'   |
|                                     |                                  |
| RAD21 F                             | 5'- GGATAAGAAGCTAACCAAAGCCC -3'  |
| RAD21 R                             | 5'- CTCCAGTAAGAGATGTCCTGAT -3'   |
|                                     |                                  |
| 18S F                               | 5'- CGATGCGCCGGCGTTATT -3'       |
| 18S R                               | 5'- CCTGGTGGTGCCCTTCCGT -3'      |
|                                     |                                  |
| pan-P63 F                           | 5'- GACAGGAAGGCGGATGAAGATAG -3'  |
| pan-P63 R                           | 5'- TGTTTCTGAAGTAAGTGCTGGTGC -3' |
|                                     |                                  |

| <b>Primers for RT-PCR analysis</b> |                               |
|------------------------------------|-------------------------------|
| GAPDH F                            | 5'-GCCTCAAGATCATCAGCAATGC-3'  |
| GAPDH R                            | 5'-CACGATACCAAAGTTGTCATGG-3'  |
|                                    |                               |
| ID2 F                              | 5'-TGACCACCCTCAACACGGATA-3'   |
| ID2 R                              | 5'-CACCGCTTATTCAGCCACACA-3'   |
|                                    |                               |
| ΔNp63 F                            | 5'-GAAGAAAGGACAGCAGCATTGAT-3' |
| ΔNp63 R                            | 5'-GGGACTGGTGGACGAGGAG-3'     |
|                                    |                               |
| TAp63 F                            | 5'-GGACTGTATCCGCATGCAG-3'     |
| TAp63 R                            | 5'-GAGCTGGGCTGTGCGTAG-3'      |
|                                    |                               |

| <b>Primers for ChIP-PCR analysis</b> |                              |
|--------------------------------------|------------------------------|
| ID2-2500 F                           | 5'-CTAGCTGGGGCCGTTTGAAC-3'   |
| ID2-2500 R                           | 5'-AAATTGCTTTCGTGGGGGAAA-3'  |
|                                      |                              |
| ID2-800 F                            | 5'-GCCCTGCCTCCTTCTTGAAAA-3'  |
| ID2-800 R                            | 5'-CGCGGGAGGCATTACTGTAAAC-3' |
|                                      |                              |
| ID2-TSS F                            | 5'-CGCCCGCTCGTCTTGATAGA-3'   |
| ID2-TSS R                            | 5'-GCTGAGCTAGCTGCGCTTGG-3'   |
|                                      |                              |



| <b>Cloning Primers</b> |                                         |
|------------------------|-----------------------------------------|
| <b>pID2-GFP</b>        |                                         |
| Forward:               | 5'- GCGGGATCCCAGTATCGAAGAGCTGCAATGT -3' |
| Reverse:               | 5'- GGGGTACCGGCTCGGCTCAGAATGAA -3'      |
|                        |                                         |
| <b>pID2-2.7K</b>       |                                         |
| Forward:               | 5'- GGGGTACCCGTTTGAAC TTTGGAGGC -3'     |
| Reverse:               | 5'- GCGGGATCCCAGGGAAGGCGAGAC -3'        |
|                        |                                         |
| <b>pID2-980</b>        |                                         |
| Forward:               | 5'- TTTCAAGGGCAGTGTATG -3'              |
| Reverse:               | 5'- GCGGGATCCCAGGGAAGGCGAGAC -3'        |
|                        |                                         |
| <b>pID2-329</b>        |                                         |
| Forward:               | 5'- TCTTCCTCCTCCCTCCT -3'               |
| Reverse:               | 5'- GCGGGATCCCAGGGAAGGCGAGAC -3'        |
